# Supplementary material for: Insulin‐like growth factor‐1 and site‐specific cancers: A Mendelian randomization study
Source: PubMed Central journal article supplement (PMC7520358; doi:10.1002/cam4.3345), 2020-07-27
Supplement: CAM4-9-6836-s001.pdf [file CAM4-9-6836-s001.pdf]

**Table S1. Single-nucleotide polymorphisms associated with insulin-like growth factor-1**

| <b>SNP</b>  | <b>Chr</b> | <b>EA</b> | <b>NEA</b> | <b>Beta</b> | <b>SE</b> | <b>P value</b> | <b>Nearby gene</b> |
|-------------|------------|-----------|------------|-------------|-----------|----------------|--------------------|
| rs10159299  | 1          | C         | T          | 0,0176      | 0,0025    | 5.112e-12      | PLXNA2             |
| rs1046011   | 1          | T         | C          | 0,0209      | 0,0027    | 3.303e-14      | LEPROT             |
| rs10779509  | 1          | C         | T          | 0,0144      | 0,0026    | 2.109e-08      | RP1-272L16.1       |
| rs11165778  | 1          | A         | G          | 0,0159      | 0,0028    | 1.492e-08      | HFM1               |
| rs112436634 | 1          | T         | C          | 0,0161      | 0,0027    | 1.749e-09      | PEX14              |
| rs1127313   | 1          | G         | A          | 0,0240      | 0,0025    | 1.394e-21      | ADAR               |
| rs11577063  | 1          | T         | G          | 0,0203      | 0,0030    | 1.511e-11      | AXDND1             |
| rs12141189  | 1          | T         | C          | 0,0449      | 0,0029    | 4.135e-53      | HLX                |
| rs1223763   | 1          | T         | G          | 0,0238      | 0,0033    | 8.461e-13      | RP11-53A1.3        |
| rs12723255  | 1          | C         | T          | 0,0170      | 0,0026    | 3.229e-11      | EIF4G3             |
| rs12749024  | 1          | T         | C          | 0,0755      | 0,0036    | 7.72e-100      | PAPPA2             |
| rs140604451 | 1          | G         | A          | 0,0540      | 0,0082    | 3.524e-11      | GSTM2              |
| rs1430753   | 1          | A         | G          | 0,0210      | 0,0032    | 7.085e-11      | WLS                |
| rs143885630 | 1          | G         | A          | 0,0303      | 0,0038    | 1.358e-15      | SMG7               |
| rs165316    | 1          | G         | A          | 0,0731      | 0,0032    | 9.66e-119      | RPL5P6             |
| rs17037452  | 1          | A         | G          | 0,0228      | 0,0034    | 1.658e-11      | CLCN6              |
| rs17393144  | 1          | A         | G          | 0,0155      | 0,0027    | 9.319e-09      | MIR34AHG           |
| rs1825813   | 1          | A         | G          | 0,0231      | 0,0031    | 1.879e-13      | C1orf146           |
| rs2075995   | 1          | C         | A          | 0,0144      | 0,0025    | 9.790e-09      | E2F2               |
| rs2724373   | 1          | C         | T          | 0,0186      | 0,0026    | 1.436e-12      | C1orf132           |
| rs2802330   | 1          | G         | A          | 0,0310      | 0,0033    | 4.632e-21      | PDIK1L             |
| rs2802951   | 1          | A         | G          | 0,0163      | 0,0028    | 4.970e-09      | RN7SL668P          |
| rs2819336   | 1          | T         | C          | 0,0273      | 0,0026    | 1.550e-25      | PTPRF              |
| rs3131646   | 1          | G         | T          | 0,0155      | 0,0027    | 1.710e-08      | MYCL               |
| rs36086195  | 1          | C         | T          | 0,0189      | 0,0025    | 1.359e-13      | ARHGEF19-AS1       |
| rs4306136   | 1          | A         | G          | 0,0173      | 0,0026    | 1.997e-11      | RP11-103C3.1       |

|            |   |   |   |        |        |           |             |
|------------|---|---|---|--------|--------|-----------|-------------|
| rs569356   | 1 | G | A | 0,0271 | 0,0036 | 5.953e-14 | OPRD1       |
| rs599839   | 1 | G | A | 0,0314 | 0,0030 | 9.629e-26 | CELSR2      |
| rs61780439 | 1 | G | A | 0,0209 | 0,0030 | 5.323e-12 | SLFNL1      |
| rs6659176  | 1 | C | G | 0,0419 | 0,0046 | 1.354e-19 | NR0B2       |
| rs6701954  | 1 | T | G | 0,0140 | 0,0025 | 3.497e-08 | USP48       |
| rs684818   | 1 | T | C | 0,0236 | 0,0025 | 9.658e-21 | RP4-781K5.7 |
| rs708108   | 1 | T | C | 0,0149 | 0,0026 | 5.872e-09 | WNT3A       |
| rs7517340  | 1 | C | T | 0,0347 | 0,0033 | 2.123e-26 | AKT3        |
| rs7528548  | 1 | C | T | 0,0543 | 0,0088 | 7.954e-10 | PYGO2       |
| rs7539178  | 1 | C | A | 0,0263 | 0,0037 | 1.365e-12 | JAK1        |
| rs7545345  | 1 | C | T | 0,0265 | 0,0037 | 1.032e-12 | NUCKS1      |
| rs75681856 | 1 | T | C | 0,0232 | 0,0040 | 5.171e-09 | RABGAP1L    |
| rs75907879 | 1 | T | C | 0,0243 | 0,0038 | 1.425e-10 | SPEN        |
| rs77369503 | 1 | G | A | 0,0452 | 0,0070 | 1.397e-10 | RGS4        |
| rs903908   | 1 | C | T | 0,0160 | 0,0025 | 2.176e-10 | SKI         |
| rs11677980 | 2 | G | A | 0,0151 | 0,0027 | 3.043e-08 | LBH         |
| rs11678946 | 2 | A | C | 0,0140 | 0,0025 | 3.143e-08 | EPHA4       |
| rs12471768 | 2 | C | T | 0,0220 | 0,0028 | 1.639e-15 | SERTAD2     |
| rs1260326  | 2 | C | T | 0,0632 | 0,0026 | 9.66e-133 | GCKR        |
| rs12710648 | 2 | A | G | 0,0174 | 0,0025 | 5.703e-12 | SMC6        |
| rs1465529  | 2 | T | C | 0,0194 | 0,0027 | 1.386e-12 | SP110       |
| rs17050272 | 2 | G | A | 0,0235 | 0,0026 | 3.201e-20 | AC073257.2  |
| rs17323117 | 2 | G | A | 0,0287 | 0,0047 | 7.980e-10 | NEU2        |
| rs17400325 | 2 | C | T | 0,0539 | 0,0065 | 9.393e-17 | PDE11A      |
| rs2674492  | 2 | A | G | 0,0141 | 0,0026 | 4.835e-08 | CYBRD1      |
| rs35135518 | 2 | T | C | 0,0286 | 0,0040 | 1.521e-12 | AC010145.4  |
| rs35641591 | 2 | C | T | 0,0496 | 0,0065 | 1.575e-14 | PCBP1-AS1   |
| rs3791679  | 2 | G | A | 0,0176 | 0,0030 | 4.338e-09 | EFEMP1      |
| rs4402747  | 2 | A | G | 0,0159 | 0,0025 | 2.960e-10 | NEU2        |

|             |   |   |   |        |        |           |            |
|-------------|---|---|---|--------|--------|-----------|------------|
| rs58387407  | 2 | G | A | 0,0175 | 0,0032 | 3.502e-08 | CACNB4     |
| rs62136965  | 2 | C | T | 0,0370 | 0,0060 | 6.429e-10 | RNU6-566P  |
| rs62182127  | 2 | A | G | 0,0193 | 0,0025 | 2.712e-14 | VIL1       |
| rs6435156   | 2 | C | T | 0,0244 | 0,0029 | 2.045e-17 | BMPR2      |
| rs6437249   | 2 | C | T | 0,0188 | 0,0027 | 4.559e-12 | HDLBP      |
| rs6544549   | 2 | T | C | 0,0240 | 0,0037 | 1.592e-10 | KCNG3      |
| rs6749680   | 2 | A | G | 0,0148 | 0,0026 | 9.868e-09 | ALMS1      |
| rs6760135   | 2 | T | C | 0,0502 | 0,0030 | 1.194e-63 | ASXL2      |
| rs702878    | 2 | A | G | 0,0143 | 0,0025 | 1.815e-08 | AC074391.1 |
| rs73954943  | 2 | A | G | 0,0313 | 0,0051 | 1.063e-09 | BCL2L11    |
| rs7574340   | 2 | T | C | 0,0172 | 0,0027 | 2.971e-10 | SLC8A1     |
| rs7578633   | 2 | T | C | 0,0182 | 0,0026 | 3.379e-12 | PAX8       |
| rs112893170 | 3 | T | C | 0,0204 | 0,0032 | 1.527e-10 | FEZF2      |
| rs11717397  | 3 | G | A | 0,0150 | 0,0025 | 2.572e-09 | UBE2E2     |
| rs11928797  | 3 | A | C | 0,0301 | 0,0039 | 2.428e-14 | UBP1       |
| rs12491473  | 3 | G | A | 0,0199 | 0,0025 | 5.913e-15 | CCDC12     |
| rs13069961  | 3 | G | A | 0,0184 | 0,0031 | 3.680e-09 | KALRN      |
| rs13073970  | 3 | T | G | 0,0246 | 0,0031 | 2.016e-15 | EIF5A2     |
| rs1822825   | 3 | G | A | 0,0139 | 0,0025 | 2.886e-08 | PPARG      |
| rs2268829   | 3 | G | A | 0,0182 | 0,0031 | 3.038e-09 | DGKG       |
| rs2607748   | 3 | C | T | 0,0168 | 0,0025 | 3.289e-11 | CHCHD4     |
| rs3772102   | 3 | G | T | 0,0204 | 0,0025 | 5.954e-16 | ST3GAL6    |
| rs4678497   | 3 | C | T | 0,0165 | 0,0026 | 1.959e-10 | SUSD5      |
| rs504603    | 3 | C | T | 0,0291 | 0,0049 | 2.402e-09 | BZW1P1     |
| rs55717031  | 3 | G | T | 0,0319 | 0,0027 | 2.474e-31 | MRPS22     |
| rs56062334  | 3 | T | C | 0,0172 | 0,0026 | 1.839e-11 | LINC02068  |
| rs62263345  | 3 | A | G | 0,0281 | 0,0037 | 1.640e-14 | BBX        |
| rs62280667  | 3 | C | T | 0,0282 | 0,0027 | 2.477e-26 | SENP7      |
| rs6440008   | 3 | T | C | 0,0352 | 0,0026 | 1.113e-41 | ZBTB38     |

|             |   |   |   |        |        |           |               |
|-------------|---|---|---|--------|--------|-----------|---------------|
| rs66707192  | 3 | G | A | 0,0182 | 0,0029 | 4.415e-10 | HRG           |
| rs687339    | 3 | T | C | 0,0399 | 0,0030 | 2.666e-40 | KRT18P35      |
| rs73238159  | 3 | C | T | 0,0254 | 0,0037 | 1.059e-11 | XRN1          |
| rs7625680   | 3 | A | G | 0,0151 | 0,0026 | 7.693e-09 | ATG7          |
| rs7628689   | 3 | G | A | 0,0288 | 0,0035 | 6.825e-17 | C3orf38       |
| rs811332    | 3 | C | T | 0,0195 | 0,0032 | 2.011e-09 | MRAS          |
| rs9819762   | 3 | T | C | 0,0185 | 0,0033 | 1.212e-08 | PIK3CA        |
| rs1055582   | 4 | C | T | 0,0274 | 0,0025 | 1.578e-27 | UBE2K         |
| rs111443396 | 4 | C | T | 0,0255 | 0,0040 | 2.015e-10 | LINC01091     |
| rs1229984   | 4 | T | C | 0,1044 | 0,0085 | 1.219e-34 | ADH1B         |
| rs13108218  | 4 | G | A | 0,0171 | 0,0026 | 5.920e-11 | HGFAC         |
| rs17429745  | 4 | G | T | 0,0260 | 0,0027 | 2.045e-21 | RP11-556I14.1 |
| rs1902023   | 4 | A | C | 0,0251 | 0,0025 | 1.951e-23 | UGT2B15       |
| rs2280099   | 4 | G | A | 0,0250 | 0,0033 | 1.923e-14 | TIGD2         |
| rs35036084  | 4 | T | C | 0,0167 | 0,0026 | 8.218e-11 | RP11-145G20.1 |
| rs3804173   | 4 | G | A | 0,0196 | 0,0027 | 4.484e-13 | PRDM5         |
| rs4394044   | 4 | T | C | 0,0140 | 0,0026 | 4.708e-08 | SORBS2        |
| rs62302688  | 4 | G | A | 0,0394 | 0,0043 | 4.057e-20 | GABRA2        |
| rs62334147  | 4 | C | T | 0,0192 | 0,0033 | 4.261e-09 | DDX60L        |
| rs62342064  | 4 | C | T | 0,0222 | 0,0037 | 1.836e-09 | RP11-119H12.3 |
| rs6532798   | 4 | T | C | 0,0370 | 0,0027 | 1.364e-41 | ADH4          |
| rs6827641   | 4 | T | C | 0,0140 | 0,0025 | 2.623e-08 | HHIP          |
| rs6853741   | 4 | A | G | 0,0237 | 0,0029 | 1.676e-16 | ARHGAP10      |
| rs7667562   | 4 | C | A | 0,0165 | 0,0028 | 3.770e-09 | LARP1B        |
| rs976002    | 4 | A | G | 0,0360 | 0,0029 | 4.672e-35 | TMPRSS11E     |
| rs11242236  | 5 | G | A | 0,0246 | 0,0025 | 1.957e-22 | C5orf66       |
| rs11954036  | 5 | T | C | 0,0375 | 0,0027 | 1.936e-44 | PDE4D         |
| rs12108803  | 5 | G | T | 0,0331 | 0,0058 | 1.015e-08 | TBCA          |
| rs12520263  | 5 | T | G | 0,0169 | 0,0028 | 2.579e-09 | RP11-357F12.1 |

|             |   |   |   |        |        |           |               |
|-------------|---|---|---|--------|--------|-----------|---------------|
| rs13168379  | 5 | A | G | 0,0306 | 0,0049 | 6.148e-10 | CPEB4         |
| rs13178887  | 5 | T | C | 0,0231 | 0,0026 | 2.712e-19 | MEF2C-AS1     |
| rs1498603   | 5 | T | G | 0,0311 | 0,0051 | 1.170e-09 | PDE4D         |
| rs17714046  | 5 | C | T | 0,0424 | 0,0060 | 1.197e-12 | TRIM41        |
| rs2042253   | 5 | T | C | 0,0227 | 0,0029 | 1.017e-14 | MIR5197       |
| rs2227819   | 5 | T | C | 0,0218 | 0,0040 | 4.322e-08 | F2R           |
| rs2366398   | 5 | T | G | 0,0185 | 0,0031 | 1.613e-09 | CTD-2151A2.3  |
| rs258775    | 5 | A | C | 0,0252 | 0,0033 | 3.394e-14 | ARHGAP26      |
| rs26822     | 5 | G | A | 0,0174 | 0,0027 | 9.845e-11 | PPIP5K2       |
| rs28650790  | 5 | T | C | 0,0175 | 0,0032 | 4.108e-08 | C5orf67       |
| rs329122    | 5 | A | G | 0,0181 | 0,0025 | 1.312e-12 | JADE2         |
| rs35668185  | 5 | T | C | 0,0561 | 0,0031 | 3.402e-73 | SLIT3         |
| rs3734166   | 5 | A | G | 0,0277 | 0,0029 | 8.063e-22 | CDC25C        |
| rs6180      | 5 | A | C | 0,0347 | 0,0025 | 6.019e-43 | GHR           |
| rs6895953   | 5 | G | A | 0,0240 | 0,0025 | 5.167e-21 | RP11-357F12.1 |
| rs72758321  | 5 | G | A | 0,0470 | 0,0060 | 3.926e-15 | PLCXD3        |
| rs73271090  | 5 | G | A | 0,0440 | 0,0034 | 7.844e-39 | CTB-1I21.1    |
| rs7719168   | 5 | C | A | 0,0303 | 0,0040 | 2.429e-14 | 15ARL         |
| rs80170948  | 5 | G | T | 0,0385 | 0,0064 | 2.221e-09 | SREK1IP1      |
| rs840809    | 5 | A | C | 0,0162 | 0,0028 | 1.183e-08 | CTD-2232E5.2  |
| rs9292578   | 5 | C | A | 0,0396 | 0,0063 | 3.195e-10 | PRLR          |
| rs1042335   | 6 | T | C | 0,0151 | 0,0027 | 3.568e-08 | HLA-DPB1      |
| rs1130838   | 6 | C | T | 0,0264 | 0,0026 | 1.848e-23 | HLA-C         |
| rs113127944 | 6 | A | G | 0,0508 | 0,0078 | 6.115e-11 | CENPW         |
| rs1150781   | 6 | G | C | 0,0263 | 0,0044 | 2.337e-09 | C6orf1        |
| rs1165196   | 6 | G | A | 0,0289 | 0,0025 | 6.414e-30 | SLC17A1       |
| rs12110787  | 6 | A | C | 0,0225 | 0,0040 | 1.857e-08 | MAP3K4        |
| rs12194618  | 6 | A | G | 0,0171 | 0,0026 | 2.686e-11 | ZFAND3        |
| rs2296198   | 6 | C | T | 0,0163 | 0,0029 | 1.937e-08 | RNF144B       |

|             |   |   |   |        |        |           |               |
|-------------|---|---|---|--------|--------|-----------|---------------|
| rs2397112   | 6 | A | G | 0,0185 | 0,0025 | 3.313e-13 | RP11-228O6.2  |
| rs28362677  | 6 | T | C | 0,0318 | 0,0035 | 1.763e-19 | BTNL2         |
| rs3008051   | 6 | C | T | 0,0144 | 0,0026 | 1.946e-08 | PDE10A        |
| rs3127579   | 6 | A | G | 0,0326 | 0,0036 | 1.230e-19 | SLC22A2       |
| rs3890746   | 6 | C | T | 0,0204 | 0,0025 | 1.060e-15 | L3MBTL3       |
| rs41285260  | 6 | T | G | 0,0385 | 0,0045 | 5.123e-18 | CENPW         |
| rs4709995   | 6 | T | C | 0,0422 | 0,0026 | 7.369e-60 | SDIM1         |
| rs584955    | 6 | A | G | 0,0362 | 0,0061 | 2.579e-09 | TMEM14C       |
| rs670049    | 6 | A | C | 0,0192 | 0,0027 | 6.417e-13 | Y_RNA         |
| rs6916994   | 6 | C | T | 0,0294 | 0,0025 | 1.519e-31 | GJB7          |
| rs6924225   | 6 | G | A | 0,0193 | 0,0034 | 1.442e-08 | RUNX2         |
| rs73382439  | 6 | C | T | 0,0188 | 0,0033 | 1.800e-08 | E2F3          |
| rs7740433   | 6 | A | G | 0,0167 | 0,0029 | 1.504e-08 | CNPY3         |
| rs7758644   | 6 | A | C | 0,0192 | 0,0034 | 1.514e-08 | RP1-155D22.1  |
| rs7774230   | 6 | T | C | 0,0260 | 0,0025 | 5.464e-25 | ESR1          |
| rs790513    | 6 | C | A | 0,0253 | 0,0029 | 1.575e-18 | OPRM1         |
| rs9321106   | 6 | A | G | 0,0184 | 0,0033 | 2.408e-08 | PTPRK         |
| rs9322822   | 6 | C | T | 0,0153 | 0,0027 | 1.349e-08 | LIN28B-AS1    |
| rs9364815   | 6 | A | G | 0,0148 | 0,0027 | 2.829e-08 | PDE10A        |
| rs9398171   | 6 | T | C | 0,0504 | 0,0028 | 9.510e-74 | FOXO3         |
| rs9398891   | 6 | T | C | 0,0175 | 0,0027 | 1.108e-10 | LAMA2         |
| rs998584    | 6 | A | C | 0,0202 | 0,0025 | 1.211e-15 | VEGFA         |
| rs10246481  | 7 | G | A | 0,0147 | 0,0026 | 1.499e-08 | AC073133.2    |
| rs10252510  | 7 | G | A | 0,0203 | 0,0027 | 8.179e-14 | GHRHR         |
| rs1050327   | 7 | A | G | 0,0168 | 0,0025 | 2.907e-11 | ZMIZ2         |
| rs114949263 | 7 | T | C | 0,0271 | 0,0040 | 1.283e-11 | TMEM176B      |
| rs11556924  | 7 | C | T | 0,0158 | 0,0026 | 9.798e-10 | ZC3HC1        |
| rs1182174   | 7 | A | G | 0,0208 | 0,0028 | 4.808e-14 | GNA12         |
| rs12666306  | 7 | G | A | 0,0170 | 0,0025 | 1.702e-11 | RP11-222O23.1 |

|             |   |   |   |        |        |           |            |
|-------------|---|---|---|--------|--------|-----------|------------|
| rs12699547  | 7 | C | T | 0,0213 | 0,0026 | 2.438e-16 | MAD1L1     |
| rs145188037 | 7 | A | G | 0,1203 | 0,0111 | 1.749e-27 | IGFBP3     |
| rs17145738  | 7 | T | C | 0,0338 | 0,0038 | 8.750e-19 | TBL2       |
| rs1986692   | 7 | G | A | 0,0150 | 0,0026 | 8.640e-09 | EXOC4      |
| rs2048672   | 7 | C | A | 0,0181 | 0,0028 | 6.405e-11 | LINC-PINT  |
| rs207212    | 7 | C | T | 0,0280 | 0,0042 | 1.659e-11 | LINC00513  |
| rs2228078   | 7 | C | T | 0,0569 | 0,0104 | 4.076e-08 | GHRHR      |
| rs2250243   | 7 | C | T | 0,0236 | 0,0030 | 1.694e-15 | ZNF316     |
| rs2270628   | 7 | T | C | 0,0329 | 0,0032 | 3.737e-25 | IGFBP3     |
| rs273956    | 7 | A | G | 0,0207 | 0,0025 | 5.369e-16 | CREB3L2    |
| rs2896395   | 7 | C | T | 0,0154 | 0,0028 | 2.446e-08 | SND1       |
| rs34312198  | 7 | A | C | 0,0241 | 0,0040 | 1.345e-09 | ZNF3       |
| rs35862187  | 7 | A | G | 0,0311 | 0,0056 | 3.484e-08 | AUTS2      |
| rs411717    | 7 | T | C | 0,0152 | 0,0025 | 2.144e-09 | COL1A2     |
| rs4719393   | 7 | T | G | 0,0268 | 0,0027 | 1.290e-22 | DGKB       |
| rs74657816  | 7 | T | G | 0,0473 | 0,0054 | 3.006e-18 | HMGN1P19   |
| rs7783012   | 7 | G | A | 0,0164 | 0,0026 | 1.561e-10 | FOXP2      |
| rs7802508   | 7 | A | G | 0,0212 | 0,0026 | 9.477e-17 | ZFAND2A    |
| rs79881512  | 7 | C | T | 0,0587 | 0,0107 | 4.185e-08 | AC073325.1 |
| rs870796    | 7 | G | A | 0,0168 | 0,0025 | 3.274e-11 | ELK1P1     |
| rs11782452  | 8 | G | A | 0,0146 | 0,0026 | 1.258e-08 | BNIP3L     |
| rs12549853  | 8 | A | G | 0,0155 | 0,0026 | 1.654e-09 | PLEC       |
| rs1431015   | 8 | C | T | 0,0195 | 0,0026 | 2.655e-14 | RNU2-54P   |
| rs1495741   | 8 | G | A | 0,0262 | 0,0030 | 5.034e-18 | NAT2       |
| rs1786342   | 8 | T | C | 0,0174 | 0,0026 | 1.241e-11 | SNX31      |
| rs2737205   | 8 | T | C | 0,0233 | 0,0025 | 4.711e-20 | TRPS1      |
| rs2978062   | 8 | G | T | 0,0188 | 0,0034 | 3.225e-08 | ST3GAL1    |
| rs445036    | 8 | T | C | 0,0191 | 0,0028 | 5.794e-12 | ZBTB10     |
| rs56352849  | 8 | A | G | 0,0158 | 0,0028 | 1.497e-08 | KCNB2      |

|             |    |   |   |        |        |           |               |
|-------------|----|---|---|--------|--------|-----------|---------------|
| rs60862542  | 8  | G | A | 0,0172 | 0,0031 | 1.648e-08 | EIF3E         |
| rs6473015   | 8  | C | A | 0,0194 | 0,0028 | 2.994e-12 | AC105242.1    |
| rs716100    | 8  | A | G | 0,0194 | 0,0027 | 7.196e-13 | ZFAT          |
| rs76393968  | 8  | G | A | 0,0596 | 0,0100 | 2.566e-09 | MSR1          |
| rs9657541   | 8  | C | T | 0,0196 | 0,0031 | 3.846e-10 | CTD-2135J3.4  |
| rs1055710   | 9  | G | A | 0,0183 | 0,0027 | 7.149e-12 | FAM120AOS     |
| rs10757291  | 9  | G | A | 0,0194 | 0,0025 | 1.487e-14 | CDKN2B-AS1    |
| rs10811787  | 9  | C | T | 0,0145 | 0,0025 | 7.833e-09 | RP11-370B11.4 |
| rs10869022  | 9  | C | T | 0,0213 | 0,0032 | 1.633e-11 | TRPM3         |
| rs10908903  | 9  | T | G | 0,0154 | 0,0025 | 1.288e-09 | GADD45G       |
| rs11557154  | 9  | T | C | 0,0237 | 0,0038 | 3.100e-10 | DCAF12        |
| rs13301073  | 9  | G | A | 0,0219 | 0,0026 | 4.056e-17 | MAPKAP1       |
| rs2378662   | 9  | G | A | 0,0167 | 0,0025 | 4.195e-11 | RP11-158D2.2  |
| rs28831479  | 9  | C | A | 0,0222 | 0,0029 | 1.196e-14 | PTCH1         |
| rs7034716   | 9  | C | T | 0,0153 | 0,0028 | 2.595e-08 | TGFBR1        |
| rs7041137   | 9  | T | C | 0,0171 | 0,0028 | 7.298e-10 | RAD23B        |
| rs7872812   | 9  | T | C | 0,0259 | 0,0036 | 3.162e-13 | ASTN2         |
| rs10047326  | 10 | A | C | 0,0165 | 0,0026 | 1.263e-10 | PIP4K2A       |
| rs10509746  | 10 | C | T | 0,0269 | 0,0025 | 1.943e-26 | Y_RNA         |
| rs10821713  | 10 | T | C | 0,0168 | 0,0026 | 5.068e-11 | ANK3          |
| rs11012712  | 10 | C | T | 0,0223 | 0,0032 | 3.752e-12 |               |
| rs116454156 | 10 | A | G | 0,0778 | 0,0101 | 1.615e-14 | FFAR4         |
| rs12244851  | 10 | T | C | 0,0153 | 0,0027 | 1.450e-08 | TCF7L2        |
| rs1832007   | 10 | G | A | 0,0567 | 0,0035 | 6.779e-60 | AKR1C4        |
| rs2274224   | 10 | G | C | 0,0237 | 0,0025 | 1.017e-20 | PLCE1         |
| rs2801482   | 10 | G | A | 0,0501 | 0,0082 | 1.130e-09 | CAMK1D        |
| rs293275    | 10 | C | T | 0,0142 | 0,0025 | 1.603e-08 | PRKG1         |
| rs3858325   | 10 | T | C | 0,0186 | 0,0025 | 1.713e-13 | GFRA1         |
| rs4418728   | 10 | G | T | 0,0237 | 0,0025 | 5.991e-21 | CYP26A1       |



|             |    |   |   |        |        |           |               |
|-------------|----|---|---|--------|--------|-----------|---------------|
| rs4917962   | 10 | T | G | 0,0240 | 0,0039 | 5.216e-10 | NOLC1         |
| rs7910087   | 10 | T | C | 0,0175 | 0,0025 | 6.229e-12 | C10orf11      |
| rs7921105   | 10 | C | T | 0,0164 | 0,0026 | 1.962e-10 | BEND7         |
| rs9630085   | 10 | G | A | 0,0224 | 0,0031 | 9.144e-13 | FFAR4         |
| rs1039481   | 11 | G | A | 0,0418 | 0,0029 | 4.113e-48 | PTPRJ         |
| rs10767874  | 11 | A | G | 0,0145 | 0,0026 | 3.973e-08 | DCDC1         |
| rs10892564  | 11 | G | A | 0,0170 | 0,0026 | 4.611e-11 | ARHGEF12      |
| rs10893499  | 11 | G | A | 0,0218 | 0,0037 | 3.842e-09 | ST3GAL4       |
| rs11024614  | 11 | C | T | 0,0227 | 0,0026 | 3.409e-18 | HPS5          |
| rs11029620  | 11 | C | T | 0,0221 | 0,0031 | 4.620e-13 | NUP98         |
| rs11031058  | 11 | T | C | 0,0218 | 0,0033 | 5.389e-11 | RPL12P30      |
| rs117104648 | 11 | C | T | 0,0364 | 0,0052 | 3.240e-12 | AP5B1         |
| rs117600498 | 11 | C | T | 0,0379 | 0,0066 | 9.548e-09 | ASCL2         |
| rs12790261  | 11 | A | C | 0,0309 | 0,0046 | 1.211e-11 | KDM2A         |
| rs146345029 | 11 | A | G | 0,0342 | 0,0061 | 1.886e-08 | GIF           |
| rs174554    | 11 | A | G | 0,0221 | 0,0026 | 7.202e-17 | FADS1         |
| rs2512525   | 11 | T | C | 0,0240 | 0,0034 | 1.427e-12 | USP35         |
| rs3213223   | 11 | A | G | 0,0761 | 0,0030 | 9.35e-144 | IGF2          |
| rs34452566  | 11 | T | G | 0,0180 | 0,0031 | 1.032e-08 | RP11-587D21.4 |
| rs35023999  | 11 | C | A | 0,0153 | 0,0025 | 1.160e-09 | ANKK1         |
| rs4936759   | 11 | C | T | 0,0162 | 0,0025 | 1.949e-10 | C11orf63      |
| rs4980661   | 11 | A | G | 0,0145 | 0,0025 | 8.689e-09 | AP000439.3    |
| rs61867536  | 11 | T | C | 0,0179 | 0,0025 | 1.132e-12 | MOB2          |
| rs61904289  | 11 | T | C | 0,0164 | 0,0027 | 1.392e-09 | EED           |
| rs625245    | 11 | G | T | 0,0158 | 0,0027 | 4.364e-09 | MRE11         |
| rs6485702   | 11 | T | C | 0,0170 | 0,0027 | 1.415e-10 | LRP4          |
| rs67257872  | 11 | A | G | 0,0141 | 0,0025 | 2.315e-08 | STK33         |
| rs7115466   | 11 | A | G | 0,0155 | 0,0028 | 2.286e-08 | H19           |
| rs72858776  | 11 | G | T | 0,0299 | 0,0047 | 1.479e-10 | RP11-396O20.2 |

|             |    |   |   |        |        |           |                |
|-------------|----|---|---|--------|--------|-----------|----------------|
| rs7947951   | 11 | G | A | 0,0202 | 0,0027 | 1.025e-13 | ARNTL          |
| rs10745954  | 12 | G | A | 0,0151 | 0,0025 | 1.690e-09 | RP11-328J6.1   |
| rs10777540  | 12 | G | T | 0,0177 | 0,0025 | 2.236e-12 | CRADD          |
| rs10841649  | 12 | C | T | 0,0213 | 0,0037 | 9.254e-09 | SLCO1B3        |
| rs10860237  | 12 | A | G | 0,0301 | 0,0027 | 2.391e-28 | RP11-1016B18.1 |
| rs11064536  | 12 | T | C | 0,0199 | 0,0034 | 2.941e-09 | WNK1           |
| rs11111274  | 12 | G | A | 0,0799 | 0,0028 | 7.59e-175 | IGF1           |
| rs11175935  | 12 | G | T | 0,0200 | 0,0032 | 5.189e-10 | LRRK2          |
| rs117564283 | 12 | T | C | 0,0291 | 0,0050 | 5.046e-09 | ACVRL1         |
| rs12231073  | 12 | T | G | 0,0174 | 0,0025 | 5.421e-12 | RNA5SP358      |
| rs12425869  | 12 | A | G | 0,0183 | 0,0031 | 3.957e-09 | SOCS2          |
| rs1351394   | 12 | C | T | 0,0236 | 0,0025 | 6.924e-21 | HMGA2          |
| rs1800574   | 12 | T | C | 0,1446 | 0,0074 | 3.641e-84 | HNF1A          |
| rs2230281   | 12 | A | G | 0,0164 | 0,0028 | 4.010e-09 | GALNT4         |
| rs2460488   | 12 | G | A | 0,0257 | 0,0033 | 1.096e-14 | RP11-110L15.1  |
| rs247917    | 12 | T | C | 0,0152 | 0,0025 | 1.322e-09 | ARID2          |
| rs2657879   | 12 | A | G | 0,0199 | 0,0033 | 9.621e-10 | GLS2           |
| rs2856321   | 12 | G | A | 0,0261 | 0,0026 | 1.583e-23 | ETV6           |
| rs3759302   | 12 | A | T | 0,0206 | 0,0032 | 6.949e-11 | KIAA1551       |
| rs4547160   | 12 | T | G | 0,0177 | 0,0027 | 3.168e-11 | AVPR1A         |
| rs7314285   | 12 | G | T | 0,0520 | 0,0050 | 2.043e-25 | CUX2           |
| rs75938105  | 12 | T | C | 0,0467 | 0,0068 | 7.468e-12 | RP11-110L15.2  |
| rs773116    | 12 | G | A | 0,0162 | 0,0025 | 1.265e-10 | ERBB3          |
| rs78607331  | 12 | C | T | 0,0374 | 0,0060 | 6.059e-10 | R3HDM2         |
| rs9738365   | 12 | A | C | 0,0581 | 0,0028 | 1.905e-92 | RP11-428G5.4   |
| rs1170158   | 13 | T | G | 0,0210 | 0,0033 | 1.041e-10 | DGKH           |
| rs118081390 | 13 | G | A | 0,0278 | 0,0049 | 1.353e-08 | FNDC3A         |
| rs1535793   | 13 | A | G | 0,0237 | 0,0028 | 7.422e-17 | LRCH1          |
| rs6602909   | 13 | C | T | 0,0203 | 0,0027 | 4.354e-14 | GAS6           |

|             |    |   |   |        |        |           |               |
|-------------|----|---|---|--------|--------|-----------|---------------|
| rs71432868  | 13 | C | T | 0,0275 | 0,0050 | 3.105e-08 | SNORA25       |
| rs7323205   | 13 | C | T | 0,0148 | 0,0026 | 9.354e-09 | LINC00676     |
| rs9532512   | 13 | A | G | 0,0428 | 0,0032 | 8.024e-40 | LINC00598     |
| rs9573360   | 13 | A | C | 0,0143 | 0,0025 | 1.597e-08 | LINC00402     |
| rs9583151   | 13 | C | T | 0,0140 | 0,0025 | 2.708e-08 | AL354741.1    |
| rs10136874  | 14 | G | T | 0,0233 | 0,0025 | 2.350e-20 | DLK1          |
| rs10145154  | 14 | T | C | 0,0185 | 0,0030 | 9.924e-10 | NRXN3         |
| rs1061638   | 14 | G | A | 0,0177 | 0,0027 | 7.484e-11 | AHSA1         |
| rs1115897   | 14 | A | C | 0,0209 | 0,0027 | 1.540e-14 | UNC79         |
| rs13379043  | 14 | T | C | 0,0246 | 0,0029 | 5.776e-18 | ELMSAN1       |
| rs168961    | 14 | G | A | 0,0184 | 0,0025 | 2.889e-13 | ZFP36L1       |
| rs17106640  | 14 | G | A | 0,0170 | 0,0026 | 8.431e-11 | ACTN1         |
| rs175043    | 14 | G | A | 0,0178 | 0,0025 | 1.834e-12 | EIF2B2        |
| rs28396553  | 14 | T | C | 0,0152 | 0,0026 | 2.962e-09 | AL162511.1    |
| rs28929474  | 14 | C | T | 0,0631 | 0,0089 | 1.294e-12 | SERPINA1      |
| rs33912345  | 14 | C | A | 0,0232 | 0,0026 | 2.363e-19 | SIX6          |
| rs36215895  | 14 | C | T | 0,0819 | 0,0129 | 2.121e-10 | SYNE2         |
| rs78598185  | 14 | G | A | 0,0288 | 0,0044 | 7.090e-11 | SLC24A4       |
| rs79936318  | 14 | A | G | 0,0173 | 0,0032 | 3.875e-08 | SYNE2         |
| rs8017377   | 14 | G | A | 0,0167 | 0,0025 | 3.353e-11 | NYNRIN        |
| rs11856160  | 15 | A | G | 0,0207 | 0,0035 | 2.843e-09 | CHD2          |
| rs12442867  | 15 | A | C | 0,0167 | 0,0026 | 9.329e-11 | RP11-299H22.1 |
| rs12593755  | 15 | T | G | 0,0155 | 0,0026 | 1.846e-09 | RP11-97O12.3  |
| rs12912439  | 15 | T | C | 0,0219 | 0,0027 | 1.246e-15 | LINC01197     |
| rs142354201 | 15 | G | A | 0,0340 | 0,0058 | 3.677e-09 | PGPEP1L       |
| rs17747633  | 15 | G | A | 0,0150 | 0,0025 | 3.080e-09 | KNL1          |
| rs2004839   | 15 | G | A | 0,0210 | 0,0034 | 4.336e-10 | RP11-299H22.3 |
| rs2311313   | 15 | G | T | 0,0189 | 0,0033 | 1.691e-08 | RP11-35O15.1  |
| rs2930313   | 15 | G | A | 0,0276 | 0,0047 | 4.141e-09 | CCDC33        |

|             |    |   |   |        |        |           |              |
|-------------|----|---|---|--------|--------|-----------|--------------|
| rs4545755   | 15 | G | A | 0,0159 | 0,0025 | 3.865e-10 | CYP19A1      |
| rs55707100  | 15 | C | T | 0,1507 | 0,0081 | 1.406e-76 | MAP1A        |
| rs5742915   | 15 | C | T | 0,0246 | 0,0025 | 1.723e-22 | PML          |
| rs79076440  | 15 | A | G | 0,0189 | 0,0033 | 1.164e-08 | USP3         |
| rs8033075   | 15 | A | G | 0,0448 | 0,0052 | 1.061e-17 | PIAS1        |
| rs11077337  | 16 | T | G | 0,0154 | 0,0025 | 1.454e-09 | ZNF597       |
| rs11149612  | 16 | C | T | 0,0271 | 0,0025 | 1.131e-26 | RP11-505K9.4 |
| rs111792934 | 16 | C | T | 0,0216 | 0,0034 | 1.430e-10 | HAS3         |
| rs116971887 | 16 | G | T | 0,0359 | 0,0061 | 4.895e-09 | SALL1        |
| rs12597502  | 16 | G | A | 0,0150 | 0,0027 | 4.528e-08 | CHD9         |
| rs12927172  | 16 | A | G | 0,0153 | 0,0026 | 3.066e-09 | IL4R         |
| rs12935091  | 16 | G | A | 0,0349 | 0,0058 | 2.235e-09 | ZNF19        |
| rs12935465  | 16 | T | C | 0,0165 | 0,0025 | 5.769e-11 | XYLT1        |
| rs143076454 | 16 | G | A | 0,0719 | 0,0093 | 1.245e-14 | LMF1         |
| rs147491123 | 16 | C | T | 0,0360 | 0,0065 | 3.286e-08 | LINC01572    |
| rs1532824   | 16 | A | C | 0,0169 | 0,0029 | 4.521e-09 | ATF7IP2      |
| rs1548917   | 16 | T | C | 0,0152 | 0,0025 | 2.361e-09 | RP11-461O7.1 |
| rs1657125   | 16 | T | G | 0,0321 | 0,0037 | 2.007e-18 | MEIOB        |
| rs17299478  | 16 | C | T | 0,0319 | 0,0034 | 2.497e-21 | NOB1         |
| rs2023762   | 16 | T | C | 0,0147 | 0,0025 | 5.991e-09 | SYT17        |
| rs4786350   | 16 | C | G | 0,0361 | 0,0062 | 6.048e-09 | IFT140       |
| rs4788220   | 16 | G | A | 0,0174 | 0,0025 | 5.263e-12 | FAM57B       |
| rs4985062   | 16 | T | C | 0,0152 | 0,0025 | 2.040e-09 | USP7         |
| rs4988483   | 16 | C | A | 0,1720 | 0,0056 | 1.87e-203 | SSTR5        |
| rs61731445  | 16 | C | T | 0,0283 | 0,0050 | 1.958e-08 |              |
| rs7204824   | 16 | C | T | 0,0240 | 0,0029 | 1.168e-16 | LMF1         |
| rs72761177  | 16 | A | G | 0,0775 | 0,0044 | 7.205e-70 | NUBP2        |
| rs74774288  | 16 | G | T | 0,0274 | 0,0032 | 2.955e-17 | RP11-420N3.3 |
| rs7498665   | 16 | G | A | 0,0193 | 0,0026 | 7.173e-14 | SH2B1        |

|             |    |   |   |        |        |           |                |
|-------------|----|---|---|--------|--------|-----------|----------------|
| rs750952    | 16 | C | T | 0,0318 | 0,0026 | 1.105e-34 | ZNF646         |
| rs753108    | 16 | A | G | 0,0247 | 0,0029 | 1.606e-17 | CMIP           |
| rs80253441  | 16 | T | C | 0,1313 | 0,0105 | 8.227e-36 | IGFALS         |
| rs8054054   | 16 | G | A | 0,0153 | 0,0025 | 1.026e-09 | CCDC154        |
| rs8054322   | 16 | A | G | 0,0149 | 0,0025 | 4.723e-09 | GSE1           |
| rs8059803   | 16 | A | G | 0,0307 | 0,0027 | 4.415e-29 | CMIP           |
| rs8182173   | 16 | T | C | 0,0176 | 0,0029 | 1.610e-09 | CORO7-PAM16    |
| rs142377191 | 17 | A | G | 0,1254 | 0,0088 | 2.048e-46 | DCAF7          |
| rs1801689   | 17 | C | A | 0,0894 | 0,0074 | 1.248e-33 | APOH           |
| rs199525    | 17 | G | T | 0,0200 | 0,0030 | 5.613e-11 | WNT3           |
| rs2309401   | 17 | T | G | 0,0149 | 0,0026 | 6.785e-09 | NLRP1          |
| rs35819807  | 17 | T | C | 0,0174 | 0,0029 | 2.387e-09 | KCNH6          |
| rs3760237   | 17 | C | T | 0,0241 | 0,0025 | 1.441e-21 | SCN4A          |
| rs4075483   | 17 | C | T | 0,0166 | 0,0026 | 1.312e-10 | BAIAP2         |
| rs4789227   | 17 | T | C | 0,0155 | 0,0026 | 4.335e-09 | UNK            |
| rs56030650  | 17 | C | A | 0,0220 | 0,0025 | 2.417e-18 | GSDMA          |
| rs6416868   | 17 | A | G | 0,0193 | 0,0025 | 3.115e-14 | TTC19          |
| rs6501601   | 17 | G | A | 0,0152 | 0,0026 | 4.071e-09 | POLR3KP2       |
| rs668799    | 17 | C | T | 0,0175 | 0,0028 | 4.019e-10 | COASY          |
| rs7502910   | 17 | A | G | 0,0161 | 0,0025 | 1.528e-10 | WDR81          |
| rs76708468  | 17 | C | T | 0,0873 | 0,0065 | 3.084e-41 | 1ERN           |
| rs77542162  | 17 | G | A | 0,0543 | 0,0086 | 2.412e-10 | ABCA6          |
| rs8075153   | 17 | C | T | 0,0215 | 0,0025 | 1.831e-17 | RAI1           |
| rs8079923   | 17 | C | T | 0,0157 | 0,0029 | 3.664e-08 | AKAP10         |
| rs9892862   | 17 | G | A | 0,0224 | 0,0030 | 9.705e-14 | Y_RNA          |
| rs11152071  | 18 | C | T | 0,0200 | 0,0029 | 8.957e-12 | RP11-1151B14.2 |
| rs12454712  | 18 | T | C | 0,0180 | 0,0026 | 4.051e-12 | BCL2           |
| rs190102446 | 18 | C | T | 0,0412 | 0,0069 | 2.452e-09 | RP11-27G24.1   |
| rs57551555  | 18 | T | G | 0,0189 | 0,0026 | 5.817e-13 | RP11-176N18.2  |

|            |    |   |   |        |        |           |            |
|------------|----|---|---|--------|--------|-----------|------------|
| rs585187   | 18 | T | G | 0,0148 | 0,0025 | 3.712e-09 | MRPS5P4    |
| rs8084351  | 18 | G | A | 0,0154 | 0,0025 | 8.537e-10 | DCC        |
| rs8095538  | 18 | G | T | 0,0205 | 0,0027 | 8.447e-14 | -          |
| rs8097893  | 18 | A | G | 0,0577 | 0,0062 | 1.723e-20 | GALR1      |
| rs11671304 | 19 | C | T | 0,0176 | 0,0027 | 6.884e-11 | ZC3H4      |
| rs12975366 | 19 | T | C | 0,0204 | 0,0026 | 2.253e-15 | LILRB5     |
| rs2287922  | 19 | G | A | 0,0305 | 0,0025 | 1.833e-33 | RASIP1     |
| rs296361   | 19 | A | G | 0,0247 | 0,0034 | 3.421e-13 | SULT2A1    |
| rs34536443 | 19 | G | C | 0,0446 | 0,0060 | 9.964e-14 | TYK2       |
| rs3760954  | 19 | T | C | 0,0235 | 0,0037 | 2.909e-10 | MIR7-3HG   |
| rs58560372 | 19 | C | T | 0,0198 | 0,0035 | 1.331e-08 | SPINT2     |
| rs58658292 | 19 | G | A | 0,0305 | 0,0056 | 4.618e-08 | ZNF536     |
| rs62102136 | 19 | C | T | 0,0155 | 0,0027 | 6.527e-09 | LSM14A     |
| rs6510033  | 19 | A | G | 0,0201 | 0,0028 | 1.147e-12 | AC005597.1 |
| rs6510177  | 19 | T | C | 0,0227 | 0,0032 | 1.598e-12 | ZNF536     |
| rs6510832  | 19 | G | T | 0,0334 | 0,0053 | 2.638e-10 | KDM4B      |
| rs67868323 | 19 | T | G | 0,0158 | 0,0028 | 2.205e-08 | ZBTB7A     |
| rs7254601  | 19 | G | A | 0,0164 | 0,0029 | 2.551e-08 | COX6B1     |
| rs7256521  | 19 | G | A | 0,0155 | 0,0025 | 9.761e-10 | ZNF845     |
| rs8105174  | 19 | C | T | 0,0497 | 0,0032 | 7.971e-54 | DNMT1      |
| rs8112883  | 19 | G | T | 0,0169 | 0,0028 | 1.166e-09 | INSR       |
| rs8113618  | 19 | T | C | 0,0307 | 0,0025 | 1.185e-33 | QTRT1      |
| rs16995311 | 20 | A | C | 0,0396 | 0,0046 | 5.559e-18 | PTPN1      |
| rs17265513 | 20 | T | C | 0,0219 | 0,0031 | 3.454e-12 | ZHX3       |
| rs2207132  | 20 | G | A | 0,0477 | 0,0070 | 1.064e-11 | LINC01728  |
| rs2424396  | 20 | G | A | 0,0329 | 0,0043 | 2.245e-14 | LINC01726  |
| rs2738787  | 20 | A | G | 0,0366 | 0,0046 | 1.251e-15 | TNFRSF6B   |
| rs4809401  | 20 | T | C | 0,0235 | 0,0038 | 6.488e-10 | NPBWR2     |
| rs6037508  | 20 | G | T | 0,0173 | 0,0030 | 8.740e-09 | SLC4A11    |

|            |    |   |   |        |        |           |           |
|------------|----|---|---|--------|--------|-----------|-----------|
| rs6046825  | 20 | A | C | 0,0240 | 0,0028 | 2.108e-17 | RALGAPA2  |
| rs6088579  | 20 | G | A | 0,0272 | 0,0033 | 8.509e-17 | NCOA6     |
| rs7267595  | 20 | A | C | 0,0155 | 0,0025 | 9.437e-10 | JAG1      |
| rs7508949  | 20 | C | G | 0,0248 | 0,0025 | 1.490e-22 | CRNKL1    |
| rs75989562 | 20 | A | G | 0,0303 | 0,0053 | 8.093e-09 | APMAP     |
| rs9978775  | 21 | G | A | 0,0186 | 0,0025 | 2.351e-13 | BRWD1-AS1 |
| rs12106594 | 22 | T | C | 0,0357 | 0,0059 | 1.588e-09 | EIF4ENIF1 |
| rs2412973  | 22 | A | C | 0,0140 | 0,0025 | 3.334e-08 | HORMAD2   |
| rs4823324  | 22 | T | C | 0,0164 | 0,0026 | 1.938e-10 | ATXN10    |
| rs5755948  | 22 | A | G | 0,0275 | 0,0036 | 4.375e-14 | RBFOX2    |
| rs6519133  | 22 | T | C | 0,0292 | 0,0026 | 7.731e-30 | JOSD1     |
| rs8138950  | 22 | C | T | 0,0153 | 0,0025 | 1.323e-09 | ZNRF3     |
| rs9611565  | 22 | T | C | 0,0290 | 0,0029 | 3.825e-23 | TEF       |

Chr, chromosome; EA, effect allele; NEA, non-effect allele; SNP, single-nucleotide polymorphisms.

**Table S2. Sources and definition of cancers in UK Biobank**

| <b>Cancer site</b> | <b>ICD-9 codes</b>                                                                            | <b>ICD-10 codes</b>                                                                                                    | <b>Self-reported cancer</b>                                                        |
|--------------------|-----------------------------------------------------------------------------------------------|------------------------------------------------------------------------------------------------------------------------|------------------------------------------------------------------------------------|
| Prostate           | 185, V10.46                                                                                   | C61, Z85.46                                                                                                            | 1044                                                                               |
| Breast             | 174, 175, V10.3                                                                               | C50, Z85.3                                                                                                             | 1002                                                                               |
| Ovary              | 183.0, 183.2, 183.8, 183.9, V10.43                                                            | C56, C57.0, C57.4, Z85.43                                                                                              | 1039                                                                               |
| Uterus             | 179, 182, V10.42,                                                                             | C54, C55, Z85.42                                                                                                       | 1040                                                                               |
| Cervix             | 180, V10.41                                                                                   | C53, Z85.41                                                                                                            | 1041                                                                               |
| Bladder            | 188, 189.1, 189.2, V10.51, V10.53                                                             | C67, C65, C66, Z85.51, Z85.54, Z85.53                                                                                  | 1035                                                                               |
| Kidney             | 189.0, V10.52                                                                                 | C64, Z85.528                                                                                                           | 1034                                                                               |
| Head/neck          | 140, 141, 142, 143, 144, 145, 146, 147, 148,<br>149, 160, 161, V10.01, V10.02, V10.21, V10.22 | C00, C01, C02, C03, C04, C05, C06, C07,<br>C08, C09, C10, C11, C12, C13, C14, C30,<br>C31, C32, Z85.21, Z85.22, Z85.81 | 1006, 1007, 1009, 1004, 1010, 1011,<br>1012, 1077, 1078, 1079, 1005, 1015,<br>1016 |
| Colorectum         | 153, 154.0, 154.1, V10.05, V10.06                                                             | C18, C19, C20, Z85.038, Z85.048                                                                                        | 1020, 1022, 1023                                                                   |
| Pancreas           | 157                                                                                           | C25, Z85.07                                                                                                            | 1034                                                                               |
| Melanoma           | 172, V10.82                                                                                   | C43, Z85.820                                                                                                           | 1059                                                                               |
| Leukaemia          | 204, 205, 206, 207, 208, V10.6                                                                | C91, C92, C93, C94.0, C94.2, C94.3, C94.4,<br>C94.8, C95, Z85.6                                                        | 1048, 1055, 1056, 1074                                                             |
| NHL                | 200, 202.0, 202.1, 202.2, 202.7, V10.71                                                       | C82, C83, C84, C85, C86, C88.0, C88.4,<br>Z85.72                                                                       | 1053                                                                               |
| Lung               | 162, V10.1                                                                                    | C33, C34, C39.9, Z85.1                                                                                                 | 1001, 1027, 1028, 1080                                                             |



**Table S3. Power calculation for the associations of insulin-like growth factor-1 with site-specific cancers**

| Cancer site          | Data source   | Cases   | Sample size | Power to detect OR of the following magnitude |      |      |      |      |      |      |      |  |
|----------------------|---------------|---------|-------------|-----------------------------------------------|------|------|------|------|------|------|------|--|
|                      |               |         |             | 0.70                                          | 0.80 | 0.90 | 0.95 | 1.05 | 1.10 | 1.20 | 1.30 |  |
| Prostate             | PRACTICAL     | 79 148  | 140 254     | 1.00                                          | 1.00 | 1.00 | 0.83 | 0.79 | 1.00 | 1.00 | 1.00 |  |
| Breast               | BCAC          | 122 977 | 228 951     | 1.00                                          | 1.00 | 1.00 | 0.96 | 0.95 | 1.00 | 1.00 | 1.00 |  |
| Ovary                | OCAC          | 25 509  | 66 450      | 1.00                                          | 1.00 | 0.98 | 0.50 | 0.47 | 0.96 | 1.00 | 1.00 |  |
| Lung                 | ILCCO         | 11 348  | 27 209      | 1.00                                          | 1.00 | 0.74 | 0.25 | 0.23 | 0.76 | 1.00 | 1.00 |  |
| Prostate             | UK Biobank    | 7872    | 168 748     | 1.00                                          | 1.00 | 0.83 | 0.30 | 0.30 | 0.82 | 1.00 | 1.00 |  |
| Breast               | UK Biobank    | 13 666  | 198 838     | 1.00                                          | 1.00 | 0.94 | 0.41 | 0.41 | 0.93 | 1.00 | 1.00 |  |
| Ovary                | UK Biobank    | 1520    | 198 838     | 0.95                                          | 0.66 | 0.22 | 0.09 | 0.09 | 0.22 | 0.66 | 0.94 |  |
| Uterus               | UK Biobank    | 1931    | 198 838     | 0.98                                          | 0.77 | 0.27 | 0.10 | 0.10 | 0.27 | 0.76 | 0.98 |  |
| Cervix               | UK Biobank    | 1928    | 198 838     | 0.98                                          | 0.77 | 0.27 | 0.10 | 0.10 | 0.27 | 0.76 | 0.98 |  |
| Bladder              | UK Biobank    | 2588    | 367 586     | 1.00                                          | 0.87 | 0.34 | 0.12 | 0.06 | 0.06 | 0.87 | 1.00 |  |
| Kidney               | UK Biobank    | 1310    | 367 586     | 0.91                                          | 0.60 | 0.20 | 0.09 | 0.09 | 0.20 | 0.60 | 0.91 |  |
| Head-neck            | UK Biobank    | 1615    | 367 586     | 0.96                                          | 0.69 | 0.23 | 0.09 | 0.09 | 0.23 | 0.69 | 0.96 |  |
| Colorectum           | UK Biobank    | 5486    | 367 586     | 1.00                                          | 0.99 | 0.62 | 0.20 | 0.20 | 0.62 | 0.99 | 1.00 |  |
| Pancreas             | UK Biobank    | 1264    | 367 586     | 0.91                                          | 0.60 | 0.20 | 0.09 | 0.09 | 0.20 | 0.60 | 0.91 |  |
| Melanoma             | UK Biobank    | 4869    | 367 586     | 1.00                                          | 0.99 | 0.57 | 0.19 | 0.19 | 0.57 | 0.99 | 1.00 |  |
| Leukemia             | UK Biobank    | 1403    | 367 586     | 0.93                                          | 0.63 | 0.21 | 0.09 | 0.09 | 0.21 | 0.63 | 0.93 |  |
| Non-Hodgkin lymphoma | UK Biobank    | 2296    | 367 586     | 0.99                                          | 0.83 | 0.31 | 0.11 | 0.11 | 0.31 | 0.83 | 0.99 |  |
| Lung                 | UK Biobank    | 2838    | 367 586     | 1.00                                          | 0.90 | 0.37 | 0.13 | 0.13 | 0.37 | 0.99 | 1.00 |  |
| Prostate             | BioBank Japan | 5408    | 109 347     | 1.00                                          | 0.99 | 0.60 | 0.20 | 0.20 | 0.59 | 0.99 | 1.00 |  |
| Lung                 | BioBank Japan | 4050    | 212 453     | 1.00                                          | 0.97 | 0.49 | 0.16 | 0.16 | 0.49 | 0.97 | 1.00 |  |
| Colorectum           | BioBank Japan | 7062    | 202 807     | 1.00                                          | 1.00 | 0.72 | 0.25 | 0.25 | 0.71 | 1.00 | 1.00 |  |
| Esophagus            | BioBank Japan | 1300    | 197 045     | 0.91                                          | 0.60 | 0.20 | 0.09 | 0.09 | 0.09 | 0.60 | 0.91 |  |
| Stomach              | BioBank Japan | 6563    | 202 308     | 1.00                                          | 1.00 | 0.69 | 0.23 | 0.23 | 0.69 | 1.00 | 1.00 |  |
| Liver                | BioBank Japan | 1866    | 197 611     | 0.98                                          | 0.75 | 0.26 | 0.10 | 0.10 | 0.26 | 0.75 | 0.98 |  |

**Table S4. Associations of genetically-predicted insulin-like growth factor-1 levels with colorectal, prostate and breast cancer in multivariable Mendelian randomization analyses adjusting for height**

| <b>Cancer site</b> | <b>Data source</b> | <b>Cases</b> | <b>Sample size</b> | <b>OR</b> | <b>95% CI</b> | <b>P</b> |
|--------------------|--------------------|--------------|--------------------|-----------|---------------|----------|
| Colorectum         | UK Biobank         | 5486         | 367 586            | 1.10      | 1.00-1.21     | 0.06     |
| Prostate           | PRACTICAL          | 79 148       | 140 254            | 1.03      | 0.97-1.10     | 0.04     |
| Prostate           | UK Biobank         | 7872         | 168 748            | 1.11      | 1.00-1.22     | 0.04     |
| Breast             | BCAC               | 122 977      | 228 951            | 1.07      | 1.02-1.13     | 0.01     |
| Breast             | UK Biobank         | 13 666       | 198 838            | 0.98      | 0.91-1.06     | 0.66     |

BCAC, Breast Cancer Association Consortium; CI, confidence interval; OR, odds ratio; PRACTICAL, Prostate Cancer Association Group to Investigate Cancer Associated Alterations in the Genome consortium.

**Table S5. Associations of genetically-predicted insulin-like growth factor-1 levels with site-specific cancers in sensitivity analyses**

| Cancer site | Data source | Cases   | Weighted median  |          | MR-Egger estimate |          |            | MR-Egger intercept        |          | Contamination mixture |          | MR-PRESSO |                  |          |                           |
|-------------|-------------|---------|------------------|----------|-------------------|----------|------------|---------------------------|----------|-----------------------|----------|-----------|------------------|----------|---------------------------|
|             |             |         | OR (95% CI)      | <i>P</i> | OR (95% CI)       | <i>P</i> | Rücker's Q | Intercept                 | <i>P</i> | OR (95% CI)           | <i>P</i> | Outliers  | OR (95% CI)*     | <i>P</i> | Distortion test, <i>P</i> |
| Colorectum  | UK Biobank  | 5486    | 1.21 (1.04-1.40) | 0.01     | 1.20 (0.98-1.47)  | 0.08     | 482.4      | -0.002 (-0.007 to 0.003)  | 0.40     | 1.34 (1.16-1.52)      | 8.4E-5   | 0         | 1.11 (1.01-1.22) | 0.03     | NA                        |
| Prostate    | PRACTICAL   | 79 148  | 1.03 (0.97-1.09) | 0.95     | 0.89 (0.78-1.03)  | 0.11     | 896.4      | 0.004 (0.000 to 0.007)    | 0.03     | 0.98 (0.91-1.07)      | 0.50     | 7         | 1.03 (0.97-1.08) | 0.36     | 0.991                     |
| Prostate    | UK Biobank  | 7872    | 1.09 (0.96-1.24) | 0.20     | 1.13 (0.92-1.38)  | 0.25     | 629.8      | 0.000 (-0.006 to 0.005)   | 0.82     | 1.11 (0.99-1.28)      | 0.08     | 3         | 1.10 (1.01-1.20) | 0.04     | 0.919                     |
| Breast      | BCAC        | 122 977 | 1.10 (1.05-1.17) | <0.001   | 1.09 (0.97-1.23)  | 0.15     | 1087.8     | 0.000 (-0.003 to 0.003)   | 0.80     | 1.17 (1.06-1.21)      | 4.8E-4   | 12        | 1.09 (1.04-1.14) | 5.7E-5   | 0.581                     |
| Breast      | UK Biobank  | 13 666  | 1.00 (0.90-1.10) | 0.94     | 0.92 (0.79-1.07)  | 0.30     | 650.4      | 0.002 (-0.002 to 0.006)   | 0.28     | 0.89 (0.83-0.96)      | 0.01     | 5         | 0.99 (0.93-1.06) | 0.84     | 0.996                     |
| Ovary       | OCAC        | 25 509  | 1.01 (0.91-1.13) | 0.80     | 1.02 (0.85-1.21)  | 0.86     | 548.7      | -0.002 (-0.006 to 0.002)  | 0.39     | 0.99 (0.90-1.12)      | 0.78     | 1         | 0.99 (0.87-1.01) | 0.10     | 0.841                     |
| Ovary       | UK Biobank  | 1520    | 0.99 (0.75-1.30) | 0.95     | 1.10 (0.77-1.57)  | 0.61     | 407.2      | -0.005 (-0.014 to 0.004)  | 0.27     | 0.88 (0.71-1.17)      | 0.45     | 0         | 0.92 (0.78-1.08) | 0.31     | NA                        |
| Lung        | ILCCO       | 11 348  | 1.04 (0.91-1.21) | 0.55     | 1.15 (0.92-1.44)  | 0.22     | 518.6      | -0.003 (-0.009 to 0.002)  | 0.23     | 1.12 (0.94-1.30)      | 0.18     | 1         | 1.03 (0.93-1.13) | 0.59     | 0.899                     |
| Lung        | UK Biobank  | 2838    | 1.19 (0.97-1.45) | 0.10     | 1.51 (1.14-1.99)  | 0.004    | 469.1      | -0.009 (-0.016 to -0.002) | 0.01     | 1.11 (0.90-1.39)      | 0.37     | 1         | 1.08 (0.95-1.23) | 0.23     | 0.884                     |
| Uterus      | UK Biobank  | 1931    | 1.15 (0.89-1.47) | 0.29     | 1.11 (0.78-1.57)  | 0.56     | 496.8      | -0.002 (-0.011 to 0.007)  | 0.60     | 1.09 (0.90-1.42)      | 0.32     | 0         | 1.02 (0.87-1.20) | 0.80     | NA                        |
| Cervix      | UK Biobank  | 1928    | 0.99 (0.78-1.27) | 0.96     | 1.09 (0.77-1.54)  | 0.64     | 499.7      | -0.003 (-0.012 to 0.006)  | 0.55     | 1.17 (0.88-1.52)      | 0.22     | 1         | 1.00 (0.85-1.17) | 0.99     | 0.003                     |
| Bladder     | UK Biobank  | 2588    | 1.17 (0.95-1.45) | 0.14     | 1.13 (0.84-1.52)  | 0.43     | 489.5      | -0.004 (-0.012 to 0.003)  | 0.26     | 1.17 (0.93-1.43)      | 0.19     | 0         | 0.97 (0.84-1.11) | 0.64     | NA                        |
| Kidney      | UK Biobank  | 1310    | 0.99 (0.73-1.34) | 0.93     | 1.03 (0.70-1.54)  | 0.87     | 440.7      | -0.000 (-0.010 to 0.100)  | 0.97     | 1.01 (0.73-1.35)      | 0.91     | 0         | 1.03 (0.85-1.23) | 0.78     | NA                        |
| Head/neck   | UK Biobank  | 1615    | 1.04 (0.79-1.35) | 0.80     | 1.02 (0.72-1.44)  | 0.90     | 383.3      | 0.000 (-0.009 to 0.009)   | 0.98     | 0.83 (0.66-1.11)      | 0.23     | 0         | 1.02 (0.87-1.19) | 0.83     | NA                        |
| Pancreas    | UK Biobank  | 1264    | 0.88 (0.65-1.19) | 0.40     | 1.27 (0.84-1.93)  | 0.26     | 469.6      | -0.010 (-0.021 to 0.001)  | 0.06     | 0.84 (0.54-1.11)      | 0.22     | 0         | 0.89 (0.74-1.08) | 0.83     | NA                        |
| Melanoma    | UK Biobank  | 4869    | 0.99 (0.85-1.16) | 0.90     | 1.09 (0.87-1.36)  | 0.72     | 522.7      | -0.002 (-0.009 to 0.003)  | 0.34     | 0.90 (0.79-1.14)      | 0.64     | 2         | 1.01 (0.91-1.11) | 0.89     | 0.08                      |
| Leukaemia   | UK Biobank  | 1403    | 1.07 (0.81-1.43) | 0.63     | 0.94 (0.65-1.36)  | 0.75     | 407.9      | 0.000 (-0.010 to 0.009)   | 0.87     | 0.89 (0.67-1.25)      | 0.34     | 0         | 0.91 (0.77-1.09) | 0.31     | NA                        |
| NHL         | UK Biobank  | 2296    | 1.01 (0.80-1.26) | 0.96     | 1.10 (0.81-1.48)  | 0.55     | 445.0      | -0.002 (-0.010 to 0.005)  | 0.54     | 0.71 (0.59-0.94)      | 0.01     | 0         | 1.01 (0.88-1.16) | 0.93     | NA                        |

\*Outlier corrected results. If no outliers were identified, results are the inverse-variance weighted estimate (same as in Figure 1). BCAC, Breast Cancer Association Consortium; CI, confidence interval; ILCCO, International Lung Cancer Consortium; MR, Mendelian randomisation; NHL; Non-Hodgkin lymphoma; OCAC, Ovarian Cancer Association Consortium; PRACTICAL, Prostate Cancer Association Group to Investigate Cancer Associated Alterations in the Genome consortium.

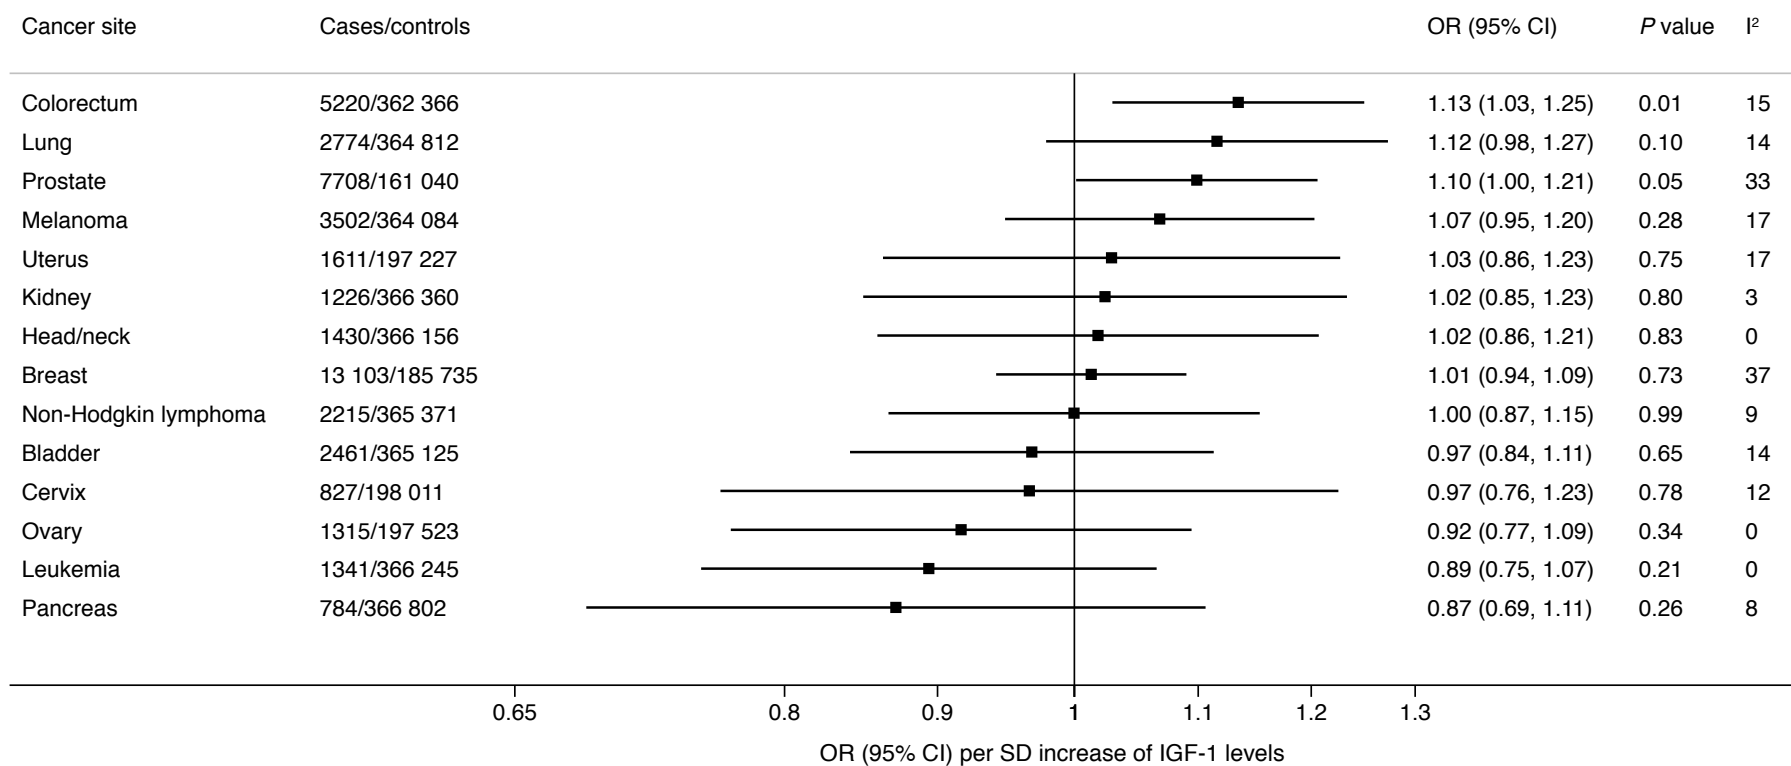

**Figure S1.** Associations of genetically predicted serum IGF-1 levels with site-specific cancers in European-descent individuals in UK Biobank in a sensitivity analysis excluding self-reported cancer. Estimates were derived using the multiplicative random-effects inverse-variance weighted method and were based on up to 416 single-nucleotide polymorphisms associated with IGF-1 levels at the genome-wide significance threshold. I<sup>2</sup> value is a measure of heterogeneity among estimates from individual single-nucleotide polymorphisms.
